# Supplementary material for: The impact of national and international travel on spatio-temporal transmission of SARS-CoV-2 in Belgium in 2021
Source: PubMed Central journal article supplement (PMC10290350; doi:10.1186/s12879-023-08368-9), 2023-06-24
Supplement: 12879_2023_8368_MOESM1_ESM.pdf [file 12879_2023_8368_MOESM1_ESM.pdf]

## Appendix

Table A1: Model parameter estimates with corresponding 95% confidence intervals (CIs) (fit with a mobility matrix defined by the sum of the initial mobility matrix and its transpose).

|                          | Local epidemic |        |      | Global epidemic |        |      | Endemic  |        |      |
|--------------------------|----------------|--------|------|-----------------|--------|------|----------|--------|------|
|                          | Estimate       | 95% CI |      | Estimate        | 95% CI |      | Estimate | 95% CI |      |
| Intercept                | 0.53           | 0.47   | 0.59 | 2.19            | 0.78   | 6.13 | 4.95     | 3.88   | 6.30 |
| Weekend                  | 0.34           | 0.33   | 0.35 | 0.17            | 0.12   | 0.23 | 0.52     | 0.50   | 0.55 |
| Population               | 1.03           | 1.02   | 1.04 | 0.78            | 0.72   | 0.84 | -        | -      | -    |
| Susceptible proportion   | 1.00           | 0.98   | 1.03 | -               | -      | -    | 1.24     | 1.17   | 1.31 |
| Travel rate              | 1.07           | 1.05   | 1.09 | 1.17            | 0.99   | 1.39 | 1.72     | 1.65   | 1.78 |
| Travel rate <sup>2</sup> | 0.97           | 0.96   | 0.98 | 0.39            | 0.31   | 0.49 | 0.97     | 0.96   | 0.98 |
| Stringency Index         | 1.01           | 1.00   | 1.01 | 0.98            | 0.97   | 0.99 | 1.01     | 1.01   | 1.02 |
| Months Jun-Sep           | 0.86           | 0.83   | 0.89 | 1.14            | 0.93   | 1.40 | 0.34     | 0.31   | 0.37 |
| Months Oct-Dec           | 1.41           | 1.35   | 1.46 | 0.77            | 0.60   | 0.99 | 0.68     | 0.61   | 0.75 |
| AIC                      | 755057.2       |        |      |                 |        |      |          |        |      |

Table A2: Parameter estimates from sensitivity analyses,using Passenger Locator Form data,fixed serial intervals with gamma(2.29, 0.36) and lognormal(1.38,0.563) distribution, a power law matrix for connectivity, and the adjusted Stringency Index

|                          | PLF data                 |           |      | Ud (gama dist.) |      |      | Ud (lognorm 12 days) |      |      | Ud (lognorm 7 days) |      |      | Power law weights |      |      | Adjusted stringency index |      |      |      |      |
|--------------------------|--------------------------|-----------|------|-----------------|------|------|----------------------|------|------|---------------------|------|------|-------------------|------|------|---------------------------|------|------|------|------|
| Local epidemic           | Intercept                | 0.65      | 0.57 | 0.74            | 1.07 | 0.96 | 1.19                 | 0.91 | 0.80 | 1.02                | 0.81 | 0.71 | 0.91              | 0.36 | 0.31 | 0.41                      | 1.33 | 1.18 | 1.51 |      |
|                          | Weekend                  | 0.33      | 0.32 | 0.34            | 0.35 | 0.34 | 0.35                 | 0.32 | 0.32 | 0.33                | 0.32 | 0.32 | 0.33              | 0.37 | 0.36 | 0.38                      | 0.31 | 0.31 | 0.32 |      |
|                          | Population               | 1.00      | 0.99 | 1.01            | 0.99 | 0.98 | 0.99                 | 0.99 | 0.98 | 1.00                | 0.99 | 0.98 | 1.00              | 1.09 | 1.08 | 1.10                      | 0.99 | 0.98 | 1.00 |      |
|                          | Susceptible prop.        | 0.98      | 0.96 | 1.00            | 1.00 | 0.98 | 1.03                 | 1.00 | 0.98 | 1.03                | 1.03 | 1.00 | 0.98              | 1.04 | 1.01 | 1.07                      | 1.02 | 0.99 | 1.04 |      |
|                          | Travel rate              | 0.73      | 0.66 | 0.81            | 1.06 | 1.04 | 1.08                 | 1.03 | 1.01 | 1.06                | 1.06 | 1.03 | 1.01              | 1.14 | 1.12 | 1.16                      | 1.01 | 0.99 | 1.03 |      |
|                          | Travel rate <sup>2</sup> | 1.33      | 1.17 | 1.51            | 0.97 | 0.97 | 0.98                 | 0.97 | 0.96 | 0.98                | 0.98 | 0.97 | 0.96              | 0.96 | 0.96 | 0.97                      | 0.98 | 0.97 | 0.99 |      |
|                          | Stringency Index         | 1.00      | 1.00 | 1.01            | 1.00 | 1.00 | 1.00                 | 1.00 | 1.00 | 1.00                | 1.00 | 1.00 | 1.00              | 1.00 | 1.00 | 1.00                      | 1.00 | 0.99 | 1.00 |      |
|                          | Months Jun-Sep           | 0.95      | 0.91 | 0.98            | 0.79 | 0.76 | 0.81                 | 0.84 | 0.81 | 0.87                | 0.87 | 0.86 | 0.82              | 0.89 | 0.79 | 0.76                      | 0.82 | 0.81 | 0.78 | 0.84 |
|                          | Months Oct-Dec           | 1.51      | 1.45 | 1.58            | 1.27 | 1.23 | 1.32                 | 1.37 | 1.31 | 1.42                | 1.42 | 1.43 | 1.37              | 1.49 | 1.13 | 1.08                      | 1.18 | 1.23 | 1.17 | 1.30 |
|                          | Global epidemic          | Intercept | 0.05 | 0.03            | 0.09 | 0.01 | 0.00                 | 0.02 | 0.02 | 0.01                | 0.04 | 0.03 | 0.02              | 0.07 | 0.00 | 0.00                      | 0.00 | 0.04 | 0.02 | 0.07 |
| Weekend                  |                          | 0.79      | 0.73 | 0.85            | 1.12 | 1.00 | 1.24                 | 0.96 | 0.87 | 1.05                | 0.86 | 0.79 | 0.93              | 0.19 | 0.17 | 0.21                      | 0.86 | 0.79 | 0.94 |      |
| Population               |                          | 1.14      | 1.10 | 1.18            | 1.17 | 1.11 | 1.23                 | 1.15 | 1.10 | 1.20                | 1.14 | 1.09 | 1.18              | 1.95 | 1.90 | 2.01                      | 1.14 | 1.09 | 1.18 |      |
| Travel rate              |                          | 2.89      | 2.12 | 3.92            | 1.52 | 1.40 | 1.66                 | 1.33 | 1.24 | 1.42                | 1.22 | 1.15 | 1.31              | 0.88 | 0.84 | 0.93                      | 1.22 | 1.15 | 1.30 |      |
| Travel rate <sup>2</sup> |                          | 0.59      | 0.42 | 0.84            | 0.98 | 0.97 | 1.00                 | 1.00 | 0.98 | 1.01                | 1.01 | 0.99 | 1.02              | 0.93 | 0.90 | 0.96                      | 1.00 | 0.99 | 1.02 |      |
| Stringency Index         |                          | 1.00      | 1.00 | 1.01            | 1.02 | 1.01 | 1.03                 | 1.02 | 1.01 | 1.03                | 1.01 | 1.00 | 1.02              | 0.99 | 0.99 | 0.99                      | 1.01 | 1.00 | 1.02 |      |
| Months Jun-Sep           |                          | 2.43      | 2.13 | 2.77            | 1.84 | 1.42 | 2.39                 | 1.92 | 1.59 | 2.32                | 1.94 | 1.64 | 2.29              | 0.73 | 0.67 | 0.79                      | 1.86 | 1.60 | 2.17 |      |
| Months Oct-Dec           |                          | 1.08      | 0.90 | 1.30            | 1.07 | 0.80 | 1.42                 | 1.11 | 0.89 | 1.37                | 1.08 | 0.89 | 1.31              | 1.04 | 0.96 | 1.13                      | 1.22 | 0.97 | 1.53 |      |
| Intercept                |                          | 2.60      | 2.07 | 3.28            | 1.71 | 1.26 | 2.32                 | 3.27 | 2.50 | 4.27                | 3.99 | 3.10 | 5.15              | 0.16 | 0.08 | 0.32                      | 2.91 | 2.29 | 3.69 |      |
| Weekend                  |                          | 0.32      | 0.30 | 0.34            | 0.43 | 0.40 | 0.47                 | 0.38 | 0.36 | 0.41                | 0.38 | 0.36 | 0.40              | 0.98 | 0.91 | 1.06                      | 0.36 | 0.34 | 0.39 |      |
| Susceptible prop.        | 0.71                     | 0.68      | 0.75 | 1.10            | 1.01 | 1.19 | 1.07                 | 0.99 | 1.15 | 1.05                | 0.98 | 1.13 | 1.51              | 1.38 | 1.65 | 1.05                      | 0.98 | 1.12 |      |      |
| Travel rate              | 2.13                     | 1.62      | 2.79 | 1.80            | 1.70 | 1.90 | 1.60                 | 1.52 | 1.69 | 1.55                | 1.48 | 1.63 | 2.16              | 2.04 | 2.29 | 1.55                      | 1.47 | 1.62 |      |      |
| Travel rate <sup>2</sup> | 0.56                     | 0.36      | 0.87 | 0.85            | 0.83 | 0.88 | 0.91                 | 0.89 | 0.94 | 0.93                | 0.91 | 0.95 | 0.95              | 0.93 | 0.96 | 0.94                      | 0.92 | 0.96 |      |      |
| Stringency Index         | 1.02                     | 1.01      | 1.02 | 1.03            | 1.02 | 1.03 | 1.02                 | 1.02 | 1.02 | 1.02                | 1.01 | 1.02 | 1.05              | 1.04 | 1.06 | 1.02                      | 1.02 | 1.03 |      |      |
| Months Jun-Sep           | 0.29                     | 0.27      | 0.32 | 0.40            | 0.36 | 0.44 | 0.32                 | 0.30 | 0.35 | 0.30                | 0.28 | 0.33 | 1.09              | 0.88 | 1.35 | 0.32                      | 0.29 | 0.34 |      |      |
| Months Oct-Dec           | 0.89                     | 0.80      | 0.99 | 1.17            | 1.02 | 1.34 | 0.93                 | 0.83 | 1.05 | 0.85                | 0.76 | 0.95 | 1.80              | 1.39 | 2.32 | 1.10                      | 0.96 | 1.25 |      |      |
| AIC                      | 754913.7                 |           |      | 753242.1        |      |      | 754079.5             |      |      | 754807.2            |      |      | 752615.3          |      |      | 754412.3                  |      |      |      |      |

Table A3: Predicted cumulative cases, and the 2.5% and 97.5% quantiles from three counterfactual scenarios. The second and third scenarios were compared to the first scenario and presented in percentages

| Scenario                               | Period 1 (18 January - 25 April) |         | Period 2 (26 April - 29 August) |                 | Period 3 (30 August - 05 December) |         |
|----------------------------------------|----------------------------------|---------|---------------------------------|-----------------|------------------------------------|---------|
|                                        | Predicted (%)                    | 2.5%    | 97.5%                           | Predicted (%)   | 2.5%                               | 97.5%   |
| Travel rate as observed                | 256,086 (100%)                   | 248,057 | 264,522                         | 199,751 (100%)  | 192,578                            | 207,548 |
| Travel rate at minimum level           | 226,966 (88.6%)                  | 220,275 | 233,748                         | 108,380 (54.3%) | 104,868                            | 111,886 |
| No connectivity between municipalities | 203,044 (79.3%)                  | 198,147 | 208,490                         | 131,701 (65.9%) | 128,545                            | 134,807 |
|                                        |                                  |         |                                 | Predicted (%)   | 2.5%                               | 97.5%   |
|                                        |                                  |         |                                 | 696,490 (100%)  | 651,185                            | 747,927 |
|                                        |                                  |         |                                 | 220,615 (31.7%) | 207,238                            | 235,268 |
|                                        |                                  |         |                                 | 391,458 (56.2%) | 371,270                            | 415,686 |

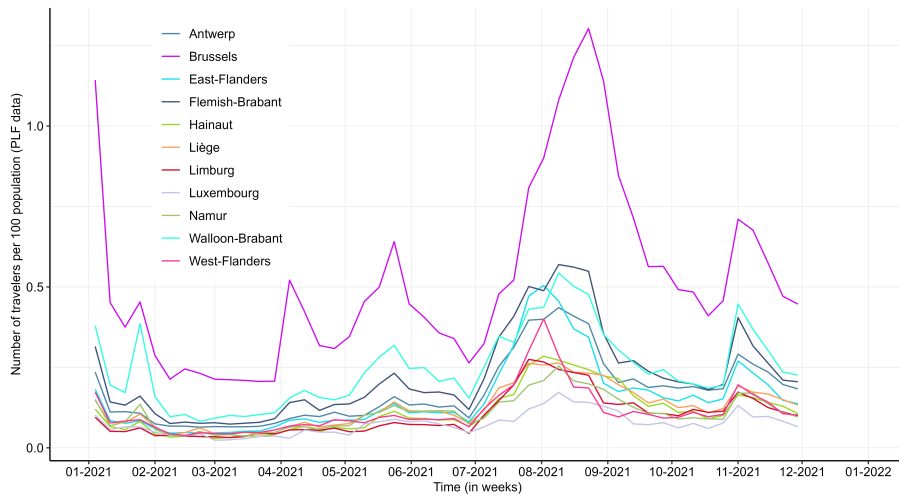

Figure A1: The number of incoming travelers per 100 population by province derived from Passenger Locator Form data

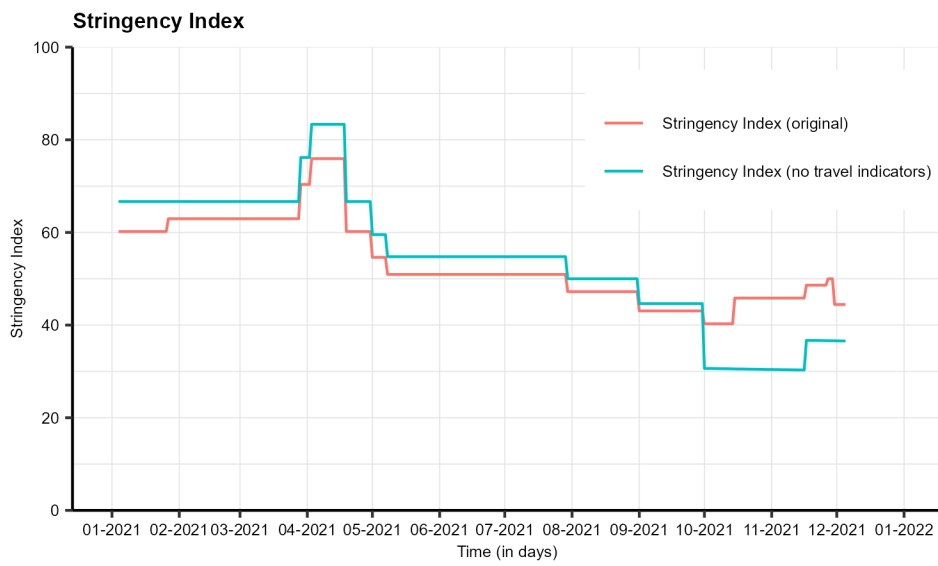

Figure A2: Comparison of two Stringency Indices, with and without travel indicators

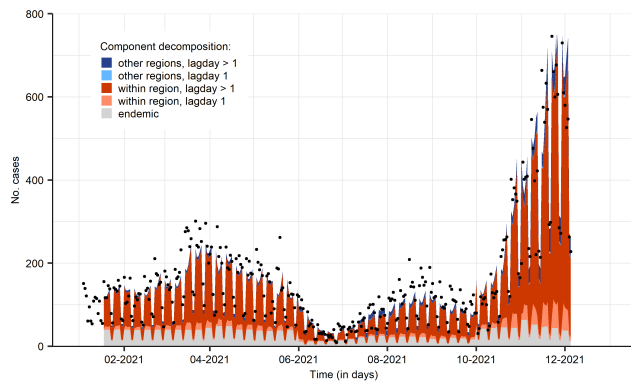

(a) Municipality 11002 in Antwerp (52 338 reported cases)

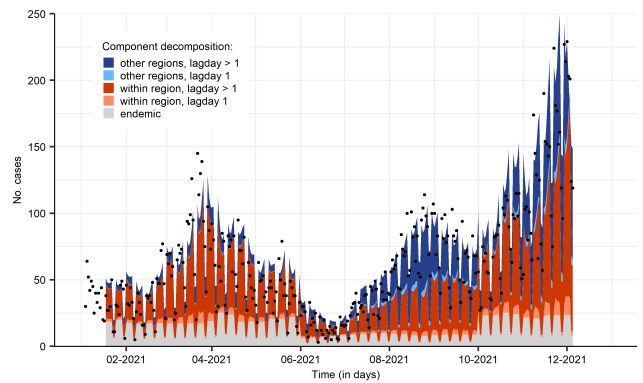

(b) Municipality 21004 in Brussels (20 121 reported cases)

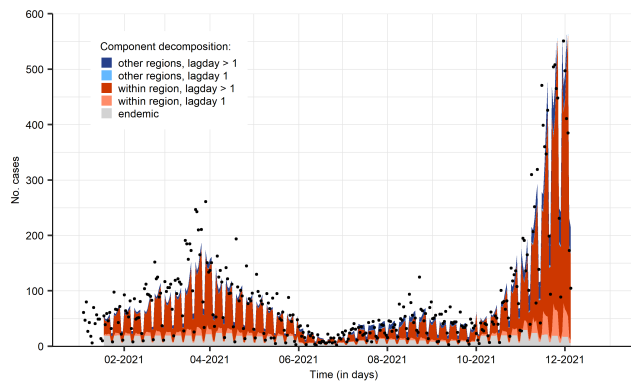

(c) Municipality 44021 in East-Flanders (27 429 reported cases)

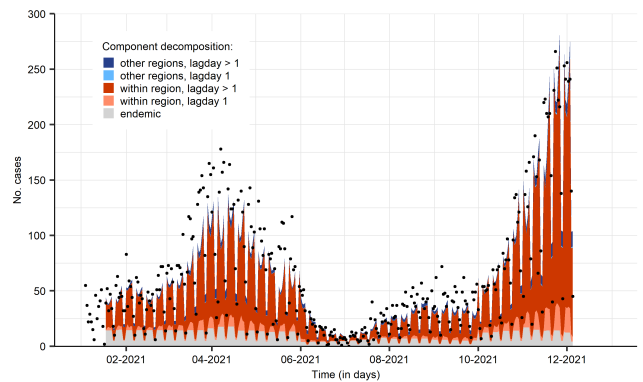

(d) Municipality 52011 in Hainaut (20 701 reported cases)

Figure A3: Fitted components of the model in selected municipalities where recorded the highest number of cases in Belgium. The dots indicate the observed number of daily infections

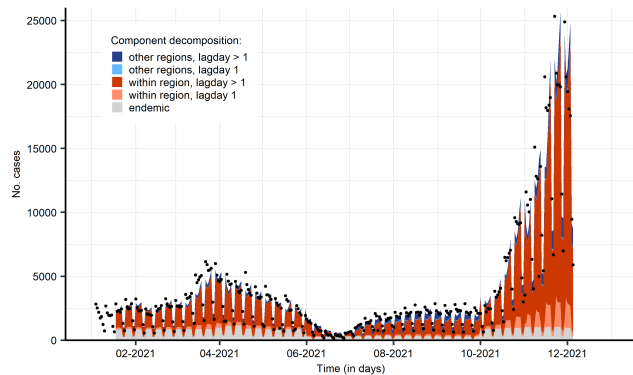

(a) Passenger Locator Form data

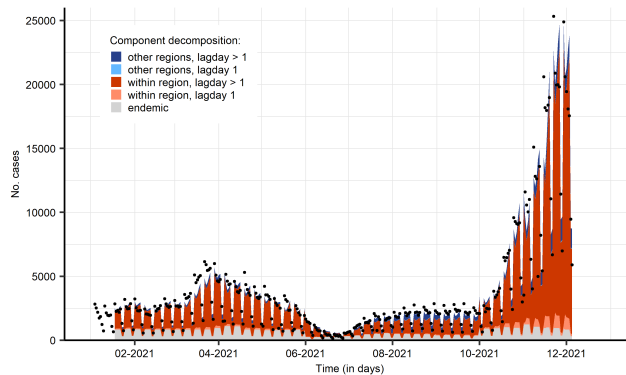

(b) Log-normal distribution of serial interval (7 days)

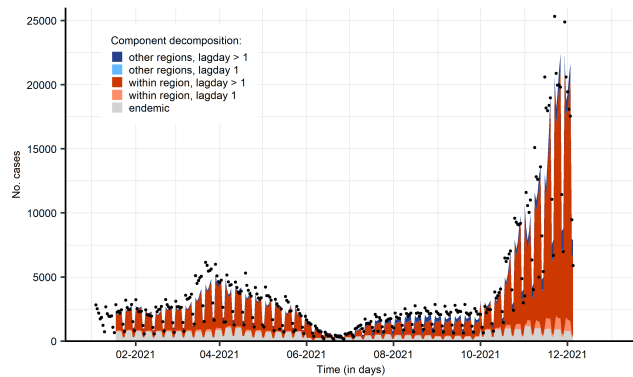

(c) Log-normal distribution of serial interval (12 days)

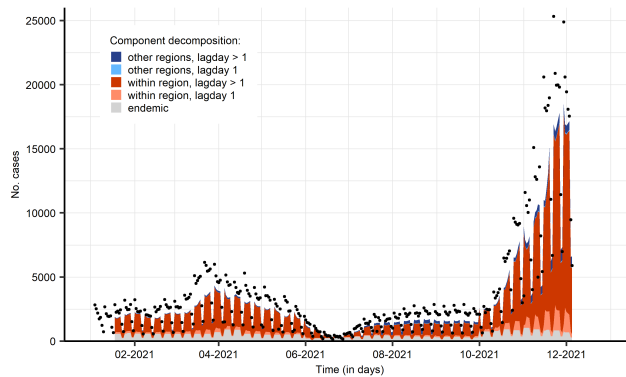

(d) Gamma distribution of serial interval (14 days)

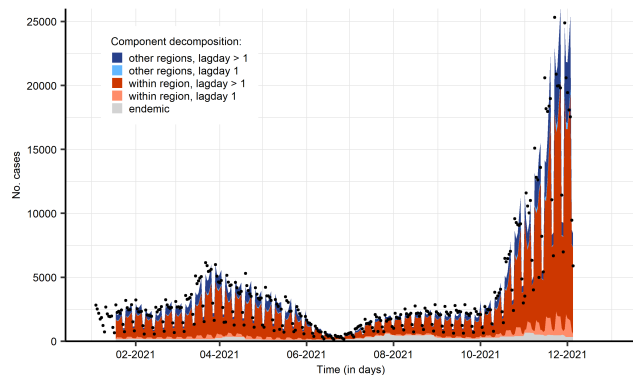

(e) Power law model

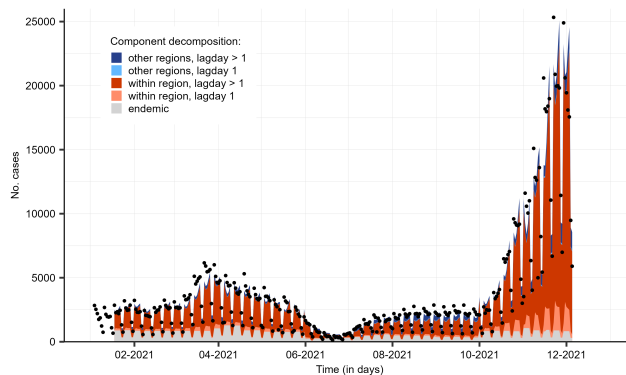

(f) Adjusted Stringency Index

Figure A4: Fitted components of the models in sensitivity analyses. The dots indicate the observed number of daily infections.

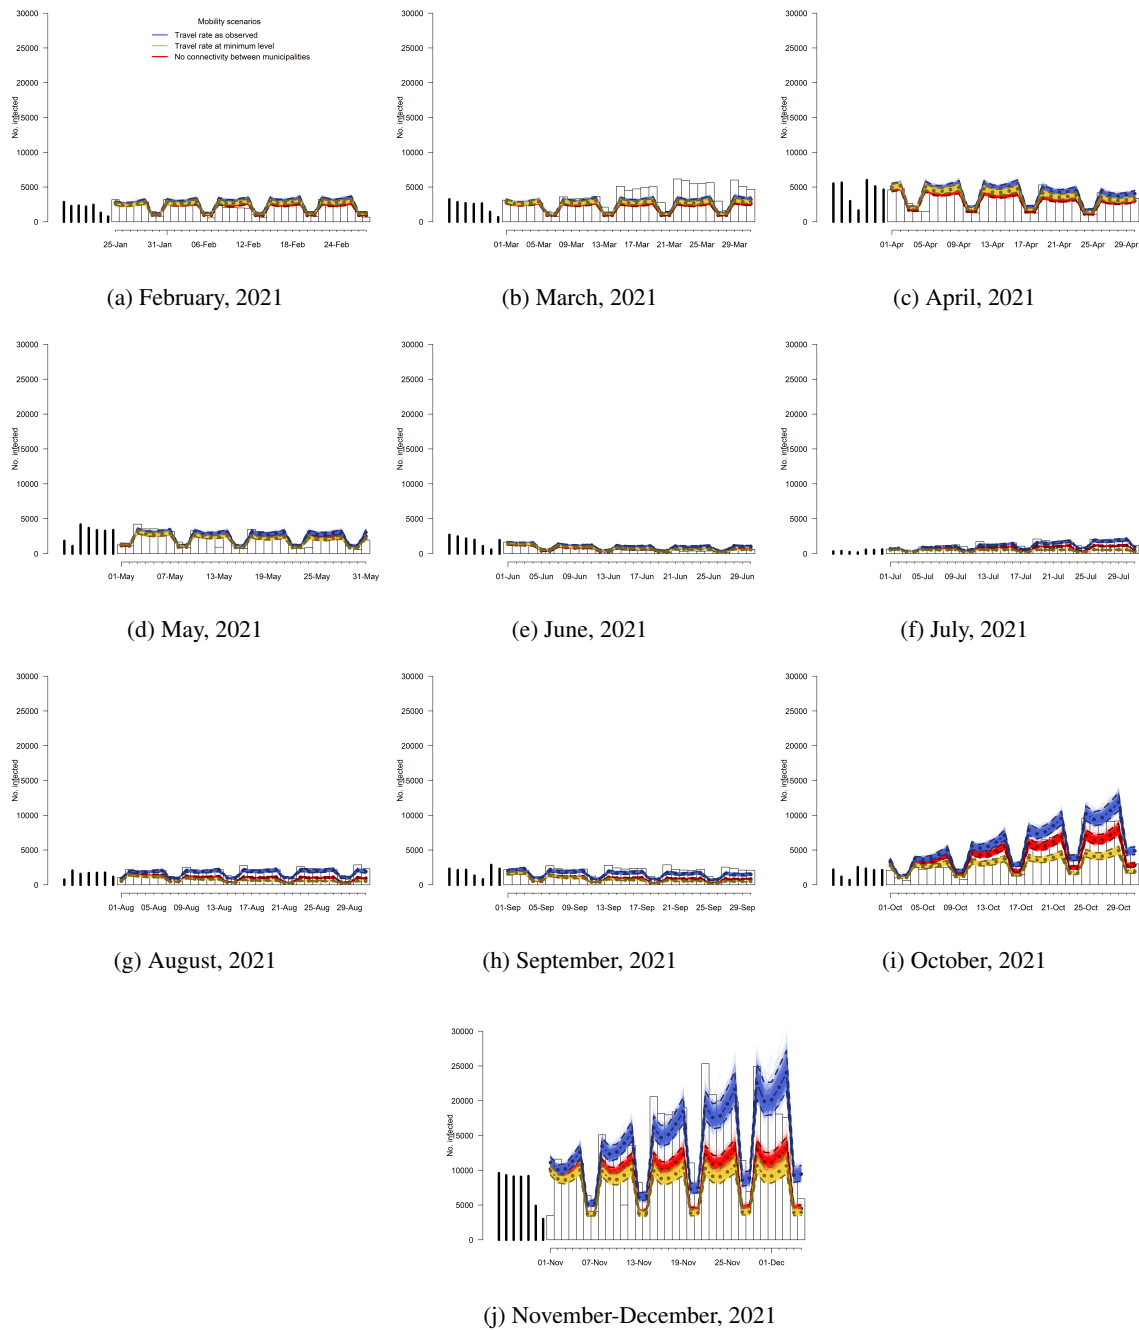

Figure A5: Comparison of simulation-based predictions for the number of infections in three mobility scenarios in each month: travel rate as observed (blue), travel rate at the minimum level observed (yellow), and no connectivity between municipalities (red) against the observed values (bar chart). In each simulation, the lower and upper lines represent the pointwise 2.5% and 97.5% simulation-based percentiles for each day; the middle line displays the mean values.

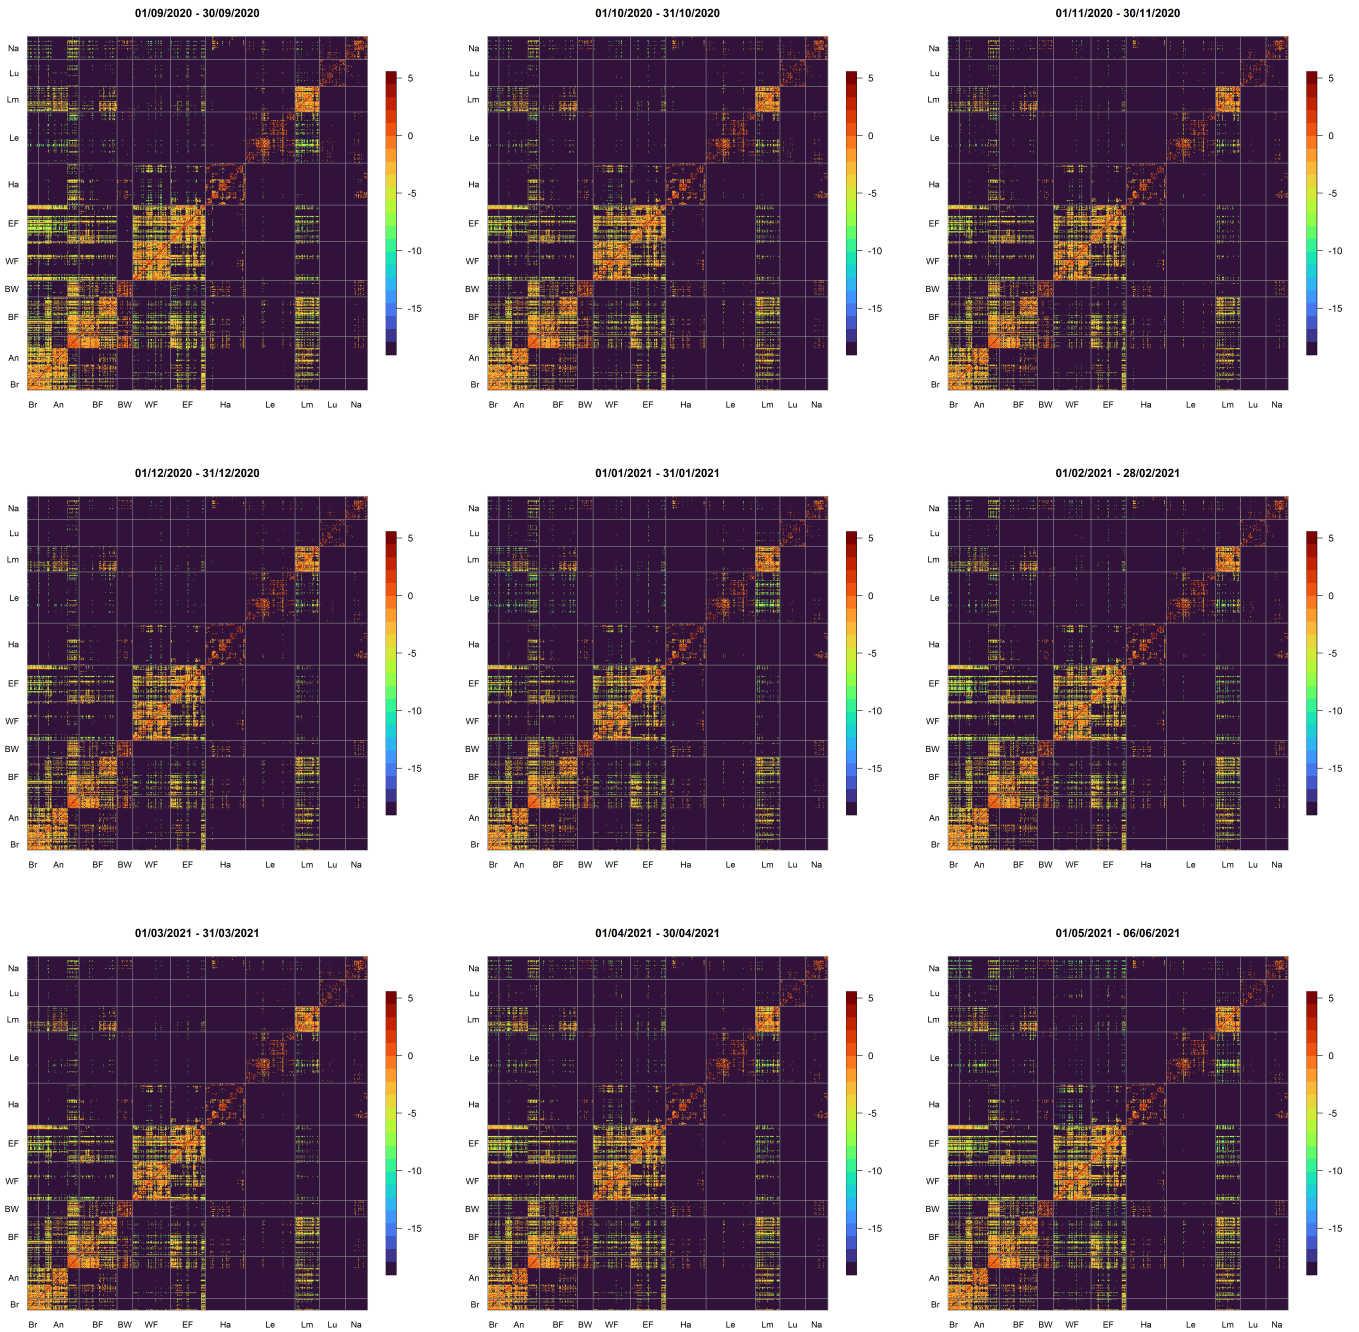

Figure A6: National mobility between September 1, 2020 and June 6, 2021 on a monthly basis. The y-axis represents the origin while the x-axis is the destination. Different municipalities are grouped according to the 10 Belgian provinces and Brussels-Capital Region (Brussels, Antwerp, Flemish Brabant, Walloon Brabant, West Flanders, East Flanders, Hainaut, Liège, Limburg, Luxembourg, and Namur).
